# Supplementary material for: Prediction of Mental Illness in Heart Disease Patients: Association of Comorbidities, Dietary Supplements, and Antibiotics as Risk Factors
Source: PubMed Central journal article supplement (PMC7712940; doi:10.3390/jpm10040214), 2020-11-09
Supplement: jpm-10-00214-s001.pdf [file jpm-10-00214-s001.pdf]

Article

# Prediction of Mental Illness in Heart Disease Patients: Association of Comorbidities, Dietary Supplements, and Antibiotic as Risk Factors

Jayanth Sivakumar<sup>1</sup>, Saba Ahmed<sup>2</sup>, Lina Begdache<sup>3</sup>, Swati Jain<sup>4</sup>, Daehan Won<sup>1,\*</sup>

<sup>1</sup> Department of Systems Science and Industrial Engineering, The State University of New York at Binghamton, Binghamton, NY 13902, USA; jsivaku1@binghamton.edu

<sup>2</sup> Department of Biological Sciences, The State University of New York at Binghamton, Binghamton, NY 13902, USA; sahmed55@binghamton.edu

<sup>3</sup> Health and Wellness Studies Department, The State University of New York at Binghamton, Binghamton, NY 13902, USA; lbegdac1@binghamton.edu

<sup>4</sup> Department of Computer Science and Engineering, Institute of Technology, Nirma University, Ahmedabad, Gujarat 382470, India; swati.jain@nirmauni.ac.in

\* Correspondence: dhwon@binghamton.edu; Tel.: +1-607-777-5024

Received: 11 September 2020; Accepted: 5 November 2020; Published: 9 November 2020

The source code is available on GitHub.

## Odds Ratio Interpretation

The association of the predictors with the mental illnesses are analyzed using the odds ratio (OR). Odds ratio is the measure of how strongly an event is associated with exposure. The ratio is the odds of the event in the exposed group to the odds of the event in the non-exposed group. When

OR=1, exposure does not affect odds of outcome

OR>1, Exposure associated with higher odds of outcome

OR<1, Exposure associated with lower odds of the outcome

This method does not account for controlling confounding variables. The confounding variable's presence affects the results of the variable being studied [1]. The results don't reflect the actual relationship between the exposure and the outcome variable. Logistic regression accounts for multiple confounders. The odds ratio computed from logistic regression's estimates is called the adjusted odds ratio (aOR) because the values are adjusted for the confounders.

**Table S1:** Average Metrics of 5-fold CV for the Mental Illnesses with no Variable Selection and no Under Sampling.

| Illness    | Model    | Accuracy | F1-Score | Sensitivity | Specificity | AUC    |
|------------|----------|----------|----------|-------------|-------------|--------|
| Depression | RF       | 0.8264   | 0.8990   | 0.9066      | 0.3636      | 0.7233 |
|            | DT       | 0.8220   | 0.8963   | 0.9025      | 0.3577      | 0.6413 |
|            | NB       | 0.7154   | 0.8051   | 0.7313      | 0.6236      | 0.7064 |
|            | XGB      | 0.8523   | 0.9202   | 1.0000      | 0.0007      | 0.7539 |
|            | LightGBM | 0.8530   | 0.9199   | 0.9903      | 0.0615      | 0.7648 |
|            | ANN      | 0.8522   | 0.9202   | 1.0000      | 0.0000      | 0.7355 |
| Anxiety    | RF       | 0.8143   | 0.8815   | 0.8891      | 0.554       | 0.7973 |
|            | DT       | 0.8102   | 0.8791   | 0.8881      | 0.5394      | 0.7256 |
|            | NB       | 0.6812   | 0.7598   | 0.654       | 0.7753      | 0.7831 |

|               |          |        |        |         |        |        |
|---------------|----------|--------|--------|---------|--------|--------|
|               | XGB      | 0.8514 | 0.9078 | 0.9416  | 0.5379 | 0.8246 |
|               | LightGBM | 0.8558 | 0.9100 | 0.938.0 | 0.5701 | 0.8318 |
|               | ANN      | 0.8486 | 0.9067 | 0.9469  | 0.5068 | 0.8145 |
| Schizophrenia | RF       | 0.9948 | 0.9974 | 0.9983  | 0.0829 | 0.5756 |
|               | DT       | 0.9933 | 0.9966 | 0.9968  | 0.0788 | 0.5411 |
|               | NB       | 0.2136 | 0.3478 | 0.2110  | 0.9098 | 0.6523 |
|               | XGB      | 0.9962 | 0.9981 | 1.0000  | 0.0000 | 0.7423 |
|               | LightGBM | 0.9961 | 0.9981 | 0.9999  | 0.0042 | 0.7334 |
|               | ANN      | 0.9962 | 0.9981 | 1.0000  | 0.0000 | 0.6587 |
| Disease       | RF       | 0.8192 | 0.8676 | 0.8788  | 0.6960 | 0.8395 |
|               | DT       | 0.8187 | 0.8673 | 0.8789  | 0.6943 | 0.7920 |
|               | NB       | 0.5935 | 0.6117 | 0.4776  | 0.8331 | 0.7995 |
|               | XGB      | 0.8516 | 0.8998 | 0.9891  | 0.5676 | 0.8431 |
|               | LightGBM | 0.8565 | 0.9035 | 0.9971  | 0.5659 | 0.8522 |
|               | ANN      | 0.8557 | 0.9033 | 0.9998  | 0.5579 | 0.8394 |

**Table S2:** Average Metrics of 5-fold CV for the Mental Illnesses with no Variable Selection and using Under Sampling.

| Illness       | Model    | Accuracy | F1-Score | Sensitivity | Specificity | AUC    |
|---------------|----------|----------|----------|-------------|-------------|--------|
| Depression    | RF       | 0.7419   | 0.7504   | 0.7762      | 0.7077      | 0.8098 |
|               | DT       | 0.7424   | 0.756    | 0.7984      | 0.6864      | 0.7458 |
|               | NB       | 0.6075   | 0.7155   | 0.9874      | 0.2277      | 0.6116 |
|               | XGB      | 0.7509   | 0.7578   | 0.7795      | 0.7224      | 0.8359 |
|               | LightGBM | 0.7648   | 0.7745   | 0.8083      | 0.7214      | 0.8518 |
|               | ANN      | 0.7443   | 0.7549   | 0.7894      | 0.6993      | 0.8244 |
| Anxiety       | RF       | 0.7785   | 0.7833   | 0.8006      | 0.7565      | 0.8379 |
|               | DT       | 0.7722   | 0.7819   | 0.8165      | 0.7280      | 0.7771 |
|               | NB       | 0.5850   | 0.7036   | 0.9852      | 0.1847      | 0.5902 |
|               | XGB      | 0.8152   | 0.8165   | 0.8222      | 0.8081      | 0.8693 |
|               | LightGBM | 0.8242   | 0.8231   | 0.8178      | 0.8306      | 0.8775 |
|               | ANN      | 0.8088   | 0.8121   | 0.8261      | 0.7914      | 0.8589 |
| Schizophrenia | RF       | 0.8779   | 0.8799   | 0.8983      | 0.8544      | 0.9268 |
|               | DT       | 0.8683   | 0.8702   | 0.8898      | 0.8423      | 0.8639 |
|               | NB       | 0.6918   | 0.7637   | 1.0000      | 0.3826      | 0.6913 |
|               | XGB      | 0.8896   | 0.8969   | 0.9636      | 0.8118      | 0.9050 |
|               | LightGBM | 0.8896   | 0.8950   | 0.9435      | 0.8303      | 0.8977 |
|               | ANN      | 0.7189   | 0.7523   | 0.8735      | 0.5544      | 0.7443 |
| Disease       | RF       | 0.8366   | 0.8408   | 0.8630      | 0.8102      | 0.8958 |
|               | DT       | 0.8386   | 0.8441   | 0.8740      | 0.8032      | 0.8447 |
|               | NB       | 0.8446   | 0.8632   | 0.9807      | 0.7086      | 0.8507 |
|               | XGB      | 0.8630   | 0.8756   | 0.9639      | 0.7622      | 0.9141 |

|          |        |        |        |        |        |
|----------|--------|--------|--------|--------|--------|
| LightGBM | 0.8663 | 0.8772 | 0.9550 | 0.7776 | 0.9159 |
| ANN      | 0.8551 | 0.8698 | 0.9683 | 0.7418 | 0.9072 |

**Table S3:** Average Metrics of 5-fold CV for the Mental Illnesses with Variable Selection using Adjusted  $R^2$  and no Under Sampling.

| Illness       | Model    | Accuracy | F1-Score | Sensitivity | Specificity | AUC    |
|---------------|----------|----------|----------|-------------|-------------|--------|
| Depression    | RF       | 0.8271   | 0.8998   | 0.9103      | 0.3479      | 0.7122 |
|               | DT       | 0.8264   | 0.8995   | 0.9114      | 0.3360      | 0.6377 |
|               | NB       | 0.7056   | 0.7939   | 0.7201      | 0.6217      | 0.6963 |
|               | XGB      | 0.8523   | 0.9202   | 1.0000      | 0.0004      | 0.7408 |
|               | LightGBM | 0.8527   | 0.9198   | 0.9909      | 0.0565      | 0.7498 |
|               | ANN      | 0.8519   | 0.9200   | 0.9996      | 0.0001      | 0.6726 |
| Anxiety       | RF       | 0.8161   | 0.8829   | 0.8932      | 0.5478      | 0.7887 |
|               | DT       | 0.8128   | 0.8814   | 0.8958      | 0.5239      | 0.7258 |
|               | NB       | 0.6912   | 0.7706   | 0.6746      | 0.7485      | 0.7763 |
|               | XGB      | 0.8515   | 0.9077   | 0.9404      | 0.5422      | 0.8116 |
|               | LightGBM | 0.8552   | 0.9094   | 0.9360      | 0.5740      | 0.8189 |
|               | ANN      | 0.8466   | 0.9056   | 0.9462      | 0.5008      | 0.7998 |
| Schizophrenia | RF       | 0.9962   | 0.9981   | 1.0000      | 0.0000      | 0.6917 |
|               | DT       | 0.9962   | 0.9981   | 1.0000      | 0.0000      | 0.6757 |
|               | NB       | 0.0542   | 0.0964   | 0.0507      | 0.9774      | 0.5146 |
|               | XGB      | 0.9962   | 0.9981   | 1.0000      | 0.0000      | 0.7084 |
|               | LightGBM | 0.9962   | 0.9981   | 1.0000      | 0.0000      | 0.6676 |
|               | ANN      | 0.9962   | 0.9981   | 1.0000      | 0.0000      | 0.6721 |
| Disease       | RF       | 0.8190   | 0.8683   | 0.8851      | 0.6825      | 0.8299 |
|               | DT       | 0.8206   | 0.8698   | 0.8894      | 0.6784      | 0.7908 |
|               | NB       | 0.5569   | 0.5550   | 0.4220      | 0.8352      | 0.7903 |
|               | XGB      | 0.8518   | 0.9000   | 0.9900      | 0.5661      | 0.8292 |
|               | LightGBM | 0.8556   | 0.9029   | 0.9963      | 0.5649      | 0.8371 |
|               | ANN      | 0.8548   | 0.9026   | 0.9981      | 0.5586      | 0.8090 |

**Table S4:** Variables Selected using Adjusted  $R^2$  with no Under Sampling.

| Depression               | Anxiety                  | Schizophrenia          | Disease                  |
|--------------------------|--------------------------|------------------------|--------------------------|
| age                      | age                      | age                    | age                      |
| InsulinDependentDiabetes | InsulinDependentDiabetes | Hypertension           | InsulinDependentDiabetes |
| Hypertension             | Hypertension             | CancerMalignant        | Hypertension             |
| Osteoarthritis           | Osteoarthritis           | HeartFailure           | Osteoarthritis           |
| CancerMalignant          | CancerMalignant          | CerebrovascularDisease | CancerMalignant          |
| Obesity                  | Obesity                  | CoronaryArteryDisease  | Obesity                  |
| CongenitalDiseaseOfHeart | CongenitalDiseaseOfHeart | NutritionDeficiency    | CongenitalDiseaseOfHeart |

|                          |                          |                          |                          |
|--------------------------|--------------------------|--------------------------|--------------------------|
| HeartFailure             | HeartFailure             | ElevatedCRP              | HeartFailure             |
| Atherosclerosis          | Atherosclerosis          | ElevatedESR              | Atherosclerosis          |
| CoronaryArteryDisease    | CoronaryArteryDisease    | LongTermUseOfAntibiotics | CoronaryArteryDisease    |
| NutritionDeficiency      | NutritionDeficiency      | Z_Pak                    | NutritionDeficiency      |
| ElevatedCRP              | ElevatedCRP              | Folate                   | ElevatedCRP              |
| LongTermUseOfAntibiotics | LongTermUseOfAntibiotics | CoQ                      | LongTermUseOfAntibiotics |
| BMI                      | BMI                      |                          | BMI                      |
| E_Mycin                  | E_Mycin                  |                          | E_Mycin                  |
| Clarithromycin           | Clarithromycin           |                          | Clarithromycin           |
| Z_Pak                    | Z_Pak                    |                          | Z_Pak                    |
| Folate                   | Folate                   |                          | Folate                   |
| VitB6                    | VitB6                    |                          | VitB6                    |
| CoQ                      | CoQ                      |                          | CoQ                      |
| Omega3FishOil            | Omega3FishOil            |                          | Omega3FishOil            |

**Table S5:** Average Metrics of 5-fold CV for the Mental Illnesses with Variable Selection using BIC and no Under Sampling.

| Illness       | Model    | Accuracy | F1-Score | Sensitivity | Specificity | AUC    |
|---------------|----------|----------|----------|-------------|-------------|--------|
| Depression    | RF       | 0.8515   | 0.9196   | 0.9971      | 0.0115      | 0.7423 |
|               | DT       | 0.8518   | 0.9198   | 0.9976      | 0.0109      | 0.7424 |
|               | NB       | 0.5273   | 0.6327   | 0.4846      | 0.7718      | 0.7075 |
|               | XGB      | 0.8522   | 0.9202   | 1.0000      | 0.0000      | 0.7387 |
|               | LightGBM | 0.8520   | 0.9200   | 0.9986      | 0.0066      | 0.7401 |
|               | ANN      | 0.8522   | 0.9202   | 1.0000      | 0.0000      | 0.7263 |
| Anxiety       | RF       | 0.8548   | 0.9087   | 0.9307      | 0.5907      | 0.8127 |
|               | DT       | 0.8546   | 0.9086   | 0.9307      | 0.5901      | 0.8122 |
|               | NB       | 0.4211   | 0.4376   | 0.2900      | 0.8773      | 0.7796 |
|               | XGB      | 0.8515   | 0.9079   | 0.9420      | 0.5366      | 0.8082 |
|               | LightGBM | 0.8546   | 0.9087   | 0.9310      | 0.5888      | 0.8142 |
|               | ANN      | 0.8530   | 0.9083   | 0.9371      | 0.5607      | 0.8071 |
| Schizophrenia | RF       | 0.9962   | 0.9981   | 1.0000      | 0.0000      | 0.6515 |
|               | DT       | 0.9962   | 0.9981   | 1.0000      | 0.0000      | 0.6515 |
|               | NB       | 0.9962   | 0.9981   | 1.0000      | 0.0000      | 0.6515 |
|               | XGB      | 0.9962   | 0.9981   | 1.0000      | 0.0000      | 0.6515 |
|               | LightGBM | 0.9962   | 0.9981   | 1.0000      | 0.0000      | 0.6515 |
|               | ANN      | 0.9962   | 0.9981   | 1.0000      | 0.0000      | 0.6515 |
| Disease       | RF       | 0.8552   | 0.9025   | 0.9942      | 0.5680      | 0.8352 |
|               | DT       | 0.8555   | 0.9028   | 0.9953      | 0.5668      | 0.8342 |
|               | NB       | 0.4847   | 0.4362   | 0.2958      | 0.8754      | 0.7936 |
|               | XGB      | 0.8523   | 0.9004   | 0.9909      | 0.5658      | 0.8282 |
|               | LightGBM | 0.8555   | 0.9028   | 0.9962      | 0.5648      | 0.8366 |

ANN 0.8550 0.9026 0.9977 0.5600 0.8282

**Table S6:** Variables Selected using BIC with no Under Sampling.

| Depression               | Anxiety                  | Schizophrenia | Disease                  |
|--------------------------|--------------------------|---------------|--------------------------|
| age                      | Age                      | Hypertension  | age                      |
| InsulinDependentDiabetes | InsulinDependentDiabetes |               | InsulinDependentDiabetes |
| Hypertension             | Hypertension             |               | Hypertension             |
| Osteoarthritis           | Osteoarthritis           |               | Osteoarthritis           |
| CancerMalignant          | CancerMalignant          |               | CancerMalignant          |
| Obesity                  | Obesity                  |               | Obesity                  |
| CongenitalDiseaseOfHeart | CongenitalDiseaseOfHeart |               | CongenitalDiseaseOfHeart |
| CoronaryArteryDisease    | HeartFailure             |               | HeartFailure             |
| NutritionDeficiency      | CoronaryArteryDisease    |               | CoronaryArteryDisease    |
| ElevatedCRP              | NutritionDeficiency      |               | NutritionDeficiency      |
| LongTermUseOfAntibiotics | ElevatedCRP              |               | ElevatedCRP              |
| Z_Pak                    | LongTermUseOfAntibiotics |               | LongTermUseOfAntibiotics |
|                          | Clarithromycin           |               | Clarithromycin           |
|                          | Z_Pak                    |               | Z_Pak                    |
|                          | CoQ                      |               | CoQ                      |

**Table S7:** Average Metrics of 5-fold CV for the Mental Illnesses with Variable Selection using Logistic Regression and no Under Sampling.

| Illness       | Model    | Accuracy | F1-Score | Sensitivity | Specificity | AUC    |
|---------------|----------|----------|----------|-------------|-------------|--------|
| Depression    | RF       | 0.8518   | 0.9197   | 0.9959      | 0.0205      | 0.7544 |
|               | DT       | 0.8519   | 0.9198   | 0.9963      | 0.0194      | 0.7546 |
|               | NB       | 0.5816   | 0.6903   | 0.5509      | 0.7574      | 0.7201 |
|               | XGB      | 0.8522   | 0.9202   | 1.0000      | 0.0000      | 0.7524 |
|               | LightGBM | 0.8524   | 0.9201   | 0.9974      | 0.0160      | 0.7567 |
|               | ANN      | 0.8522   | 0.9202   | 1.0000      | 0.0000      | 0.7458 |
| Anxiety       | RF       | 0.8548   | 0.9087   | 0.9308      | 0.5901      | 0.8260 |
|               | DT       | 0.8547   | 0.9087   | 0.9312      | 0.5884      | 0.8247 |
|               | NB       | 0.4191   | 0.4334   | 0.2860      | 0.8819      | 0.7867 |
|               | XGB      | 0.8507   | 0.9075   | 0.9426      | 0.5310      | 0.8230 |
|               | LightGBM | 0.8550   | 0.9091   | 0.9331      | 0.5833      | 0.8289 |
|               | ANN      | 0.8530   | 0.9084   | 0.9377      | 0.5586      | 0.8190 |
| Schizophrenia | RF       | 0.9947   | 0.9973   | 0.9982      | 0.0787      | 0.5665 |
|               | DT       | 0.9934   | 0.9967   | 0.9969      | 0.0788      | 0.5432 |
|               | NB       | 0.8317   | 0.9079   | 0.8330      | 0.4879      | 0.6948 |
|               | XGB      | 0.9962   | 0.9981   | 1.0000      | 0.0000      | 0.7361 |
|               | LightGBM | 0.9960   | 0.9980   | 0.9997      | 0.0000      | 0.7340 |

|         |          |        |        |        |        |        |
|---------|----------|--------|--------|--------|--------|--------|
|         | ANN      | 0.9962 | 0.9981 | 1.0000 | 0.0000 | 0.6681 |
|         | RF       | 0.8548 | 0.9021 | 0.9922 | 0.5710 | 0.8490 |
|         | DT       | 0.8549 | 0.9022 | 0.9930 | 0.5695 | 0.8470 |
| Disease | NB       | 0.4832 | 0.4309 | 0.2903 | 0.8817 | 0.8008 |
|         | XGB      | 0.8519 | 0.9001 | 0.9899 | 0.5666 | 0.8433 |
|         | LightGBM | 0.8555 | 0.9028 | 0.9957 | 0.5656 | 0.8515 |
|         | ANN      | 0.8551 | 0.9028 | 0.9982 | 0.5594 | 0.8451 |

**Table S8:** Variables Selected using Logistic Regression with no Under Sampling.

| Depression               | Anxiety                  | Schizophrenia         | Disease                  |
|--------------------------|--------------------------|-----------------------|--------------------------|
| Gender                   | Gender                   | Gender                | Gender                   |
| age                      | age                      | age                   | age                      |
| InsulinDependentDiabetes | InsulinDependentDiabetes | Hypertension          | InsulinDependentDiabetes |
| Hypertension             | Hypertension             | Obesity               | Hypertension             |
| Osteoarthritis           | Osteoarthritis           | CoronaryArteryDisease | Osteoarthritis           |
| CancerMalignant          | CancerMalignant          | BMI                   | CancerMalignant          |
| Obesity                  | Obesity                  | Z_Pak                 | Obesity                  |
| CongenitalDiseaseOfHeart | CongenitalDiseaseOfHeart |                       | CongenitalDiseaseOfHeart |
| CerebrovascularDisease   | HeartFailure             |                       | HeartFailure             |
| CoronaryArteryDisease    | Atherosclerosis          |                       | Atherosclerosis          |
| NutritionDeficiency      | CoronaryArteryDisease    |                       | CoronaryArteryDisease    |
| ElevatedCRP              | NutritionDeficiency      |                       | NutritionDeficiency      |
| LongTermUseOfAntibiotics | ElevatedCRP              |                       | ElevatedCRP              |
| Z_Pak                    | LongTermUseOfAntibiotics |                       | LongTermUseOfAntibiotics |
|                          | Clarithromycin           |                       | Clarithromycin           |
|                          | Z_Pak                    |                       | Z_Pak                    |
|                          | VitB6                    |                       | Folate                   |
|                          | CoQ                      |                       | VitB6                    |
|                          |                          |                       | CoQ                      |

**Table S9:** Average Metrics of 5-fold CV for the Mental Illnesses with Variable Selection using Adjusted  $R^2$  and Under Sampling.

| Illness    | Model    | Accuracy | F1-Score | Sensitivity | Specificity | AUC    |
|------------|----------|----------|----------|-------------|-------------|--------|
| Depression | RF       | 0.7528   | 0.7633   | 0.7972      | 0.7086      | 0.8189 |
| Depression | DT       | 0.7539   | 0.7704   | 0.8261      | 0.6817      | 0.7583 |
| Depression | NB       | 0.6092   | 0.7172   | 0.9913      | 0.2272      | 0.6152 |
| Depression | XGB      | 0.7653   | 0.7791   | 0.8278      | 0.7030      | 0.8503 |
| Depression | LightGBM | 0.7801   | 0.7913   | 0.8338      | 0.7265      | 0.8626 |
| Depression | ANN      | 0.7498   | 0.7622   | 0.8066      | 0.6940      | 0.8289 |
| Anxiety    | RF       | 0.7880   | 0.7946   | 0.8200      | 0.7561      | 0.8426 |

|               |          |        |        |        |        |        |
|---------------|----------|--------|--------|--------|--------|--------|
| Anxiety       | DT       | 0.7815 | 0.7934 | 0.8387 | 0.7244 | 0.7894 |
| Anxiety       | NB       | 0.5855 | 0.7039 | 0.9853 | 0.1857 | 0.5949 |
| Anxiety       | XGB      | 0.8224 | 0.8243 | 0.8330 | 0.8118 | 0.8793 |
| Anxiety       | LightGBM | 0.8293 | 0.8286 | 0.8251 | 0.8335 | 0.8845 |
| Anxiety       | ANN      | 0.8098 | 0.8139 | 0.8317 | 0.7878 | 0.8489 |
| Schizophrenia | RF       | 0.6027 | 0.6251 | 0.6709 | 0.5326 | 0.6127 |
| Schizophrenia | DT       | 0.6047 | 0.6329 | 0.6866 | 0.5206 | 0.6073 |
| Schizophrenia | NB       | 0.5115 | 0.6712 | 1.0000 | 0.0235 | 0.5455 |
| Schizophrenia | XGB      | 0.6183 | 0.6267 | 0.6465 | 0.5845 | 0.6307 |
| Schizophrenia | LightGBM | 0.6086 | 0.6493 | 0.7278 | 0.4842 | 0.6278 |
| Schizophrenia | ANN      | 0.6144 | 0.6369 | 0.6901 | 0.5362 | 0.6302 |
| Disease       | RF       | 0.8411 | 0.8467 | 0.8780 | 0.8042 | 0.8912 |
| Disease       | DT       | 0.8446 | 0.8519 | 0.8940 | 0.7953 | 0.8524 |
| Disease       | NB       | 0.8483 | 0.8663 | 0.9830 | 0.7136 | 0.8497 |
| Disease       | XGB      | 0.8670 | 0.8788 | 0.9646 | 0.7695 | 0.9130 |
| Disease       | LightGBM | 0.8688 | 0.8795 | 0.9580 | 0.7796 | 0.9128 |
| Disease       | ANN      | 0.8588 | 0.8716 | 0.9590 | 0.7585 | 0.9013 |

**Table S10:** Variables Selected using Adjusted  $R^2$  before Under Sampling.

| Depression               | Anxiety                  | Schizophrenia            | Disease                  |
|--------------------------|--------------------------|--------------------------|--------------------------|
| age                      | age                      | age                      | age                      |
| InsulinDependentDiabetes | InsulinDependentDiabetes | Hypertension             | InsulinDependentDiabetes |
| Hypertension             | Hypertension             | CancerMalignant          | Hypertension             |
| Osteoarthritis           | Osteoarthritis           | HeartFailure             | Osteoarthritis           |
| CancerMalignant          | CancerMalignant          | CerebrovascularDisease   | CancerMalignant          |
| Obesity                  | Obesity                  | CoronaryArteryDisease    | Obesity                  |
| CongenitalDiseaseOfHeart | CongenitalDiseaseOfHeart | NutritionDeficiency      | CongenitalDiseaseOfHeart |
| HeartFailure             | HeartFailure             | ElevatedCRP              | HeartFailure             |
| Atherosclerosis          | Atherosclerosis          | ElevatedESR              | Atherosclerosis          |
| CoronaryArteryDisease    | CoronaryArteryDisease    | LongTermUseOfAntibiotics | CoronaryArteryDisease    |
| NutritionDeficiency      | NutritionDeficiency      | Z_Pak                    | NutritionDeficiency      |
| ElevatedCRP              | ElevatedCRP              | Folate                   | ElevatedCRP              |
| LongTermUseOfAntibiotics | LongTermUseOfAntibiotics | CoQ                      | LongTermUseOfAntibiotics |
| BMI                      | BMI                      |                          | BMI                      |
| E_Mycin                  | E_Mycin                  |                          | E_Mycin                  |
| Clarithromycin           | Clarithromycin           |                          | Clarithromycin           |
| Z_Pak                    | Z_Pak                    |                          | Z_Pak                    |
| Folate                   | Folate                   |                          | Folate                   |
| VitB6                    | VitB6                    |                          | VitB6                    |
| CoQ                      | CoQ                      |                          | CoQ                      |
| Omega3FishOil            | Omega3FishOil            |                          | Omega3FishOil            |

**Table S11:** Average Metrics of 5-fold CV for the Mental Illnesses with Variable Selection using BIC and Under Sampling.

| Illness       | Model    | Accuracy | F1-Score | Sensitivity | Specificity | AUC    |
|---------------|----------|----------|----------|-------------|-------------|--------|
| Depression    | RF       | 0.6979   | 0.7283   | 0.8099      | 0.5862      | 0.7461 |
|               | DT       | 0.6978   | 0.7291   | 0.8137      | 0.5820      | 0.7459 |
|               | NB       | 0.5058   | 0.6689   | 0.9985      | 0.0130      | 0.5061 |
|               | XGB      | 0.6985   | 0.7270   | 0.8031      | 0.5940      | 0.7414 |
|               | LightGBM | 0.6966   | 0.7265   | 0.8059      | 0.5876      | 0.7454 |
|               | ANN      | 0.6959   | 0.7208   | 0.7874      | 0.6045      | 0.7424 |
| Anxiety       | RF       | 0.7662   | 0.7934   | 0.8978      | 0.6347      | 0.8167 |
|               | DT       | 0.7655   | 0.7936   | 0.9016      | 0.6295      | 0.8145 |
|               | NB       | 0.5071   | 0.6678   | 0.9907      | 0.0234      | 0.5072 |
|               | XGB      | 0.7645   | 0.7916   | 0.8948      | 0.6342      | 0.8141 |
|               | LightGBM | 0.7652   | 0.7930   | 0.8996      | 0.6307      | 0.8172 |
|               | ANN      | 0.7639   | 0.7950   | 0.9158      | 0.6120      | 0.8089 |
| Schizophrenia | RF       | 0.6222   | 0.6339   | 0.6571      | 0.5848      | 0.6210 |
|               | DT       | 0.6222   | 0.6339   | 0.6571      | 0.5848      | 0.6210 |
|               | NB       | 0.6222   | 0.6339   | 0.6571      | 0.5848      | 0.6210 |
|               | XGB      | 0.6222   | 0.6339   | 0.6571      | 0.5848      | 0.6210 |
|               | LightGBM | 0.6222   | 0.6339   | 0.6571      | 0.5848      | 0.6210 |
|               | ANN      | 0.6028   | 0.5143   | 0.5364      | 0.6728      | 0.6235 |
| Disease       | RF       | 0.7852   | 0.8188   | 0.9709      | 0.5995      | 0.8391 |
|               | DT       | 0.7845   | 0.8187   | 0.9733      | 0.5956      | 0.8380 |
|               | NB       | 0.7713   | 0.8075   | 0.9592      | 0.5834      | 0.7951 |
|               | XGB      | 0.7809   | 0.8139   | 0.9581      | 0.6037      | 0.8351 |
|               | LightGBM | 0.7853   | 0.8194   | 0.9741      | 0.5965      | 0.8395 |
|               | ANN      | 0.7821   | 0.8203   | 0.9945      | 0.5698      | 0.8205 |

**Table S12:** Variables Selected using BIC before Under Sampling.

| Depression               | Anxiety                  | Schizophrenia | Disease                  |
|--------------------------|--------------------------|---------------|--------------------------|
| age                      | age                      | Hypertension  | age                      |
| InsulinDependentDiabetes | InsulinDependentDiabetes |               | InsulinDependentDiabetes |
| Hypertension             | Hypertension             |               | Hypertension             |
| Osteoarthritis           | Osteoarthritis           |               | Osteoarthritis           |
| CancerMalignant          | CancerMalignant          |               | CancerMalignant          |
| Obesity                  | Obesity                  |               | Obesity                  |
| CongenitalDiseaseOfHeart | CongenitalDiseaseOfHeart |               | CongenitalDiseaseOfHeart |
| CoronaryArteryDisease    | HeartFailure             |               | HeartFailure             |
| NutritionDeficiency      | CoronaryArteryDisease    |               | CoronaryArteryDisease    |



|                          |                          |                          |
|--------------------------|--------------------------|--------------------------|
| ElevatedCRP              | NutritionDeficiency      | NutritionDeficiency      |
| LongTermUseOfAntibiotics | ElevatedCRP              | ElevatedCRP              |
| Z_Pak                    | LongTermUseOfAntibiotics | LongTermUseOfAntibiotics |
|                          | Clarithromycin           | Clarithromycin           |
|                          | Z_Pak                    | Z_Pak                    |
|                          | CoQ                      | CoQ                      |

**Table S13:** Average Metrics of 5-fold CV for the Mental Illnesses with Variable Selection using Logistic Regression and Under Sampling.

| Illness       | Model    | Accuracy | F1-Score | Sensitivity | Specificity | AUC    |
|---------------|----------|----------|----------|-------------|-------------|--------|
| Depression    | RF       | 0.7099   | 0.7322   | 0.7935      | 0.6262      | 0.7592 |
|               | DT       | 0.7090   | 0.7325   | 0.7969      | 0.6211      | 0.7546 |
|               | NB       | 0.5072   | 0.6697   | 0.9992      | 0.0152      | 0.5078 |
|               | XGB      | 0.7076   | 0.7254   | 0.7726      | 0.6429      | 0.7587 |
|               | LightGBM | 0.7073   | 0.7301   | 0.7917      | 0.6231      | 0.7580 |
|               | ANN      | 0.7047   | 0.7344   | 0.8168      | 0.5924      | 0.7512 |
| Anxiety       | RF       | 0.7719   | 0.7936   | 0.8774      | 0.6665      | 0.8314 |
|               | DT       | 0.7706   | 0.7935   | 0.8819      | 0.6593      | 0.8307 |
|               | NB       | 0.5102   | 0.6697   | 0.9931      | 0.0273      | 0.5105 |
|               | XGB      | 0.7678   | 0.7905   | 0.8761      | 0.6595      | 0.8289 |
|               | LightGBM | 0.7697   | 0.7920   | 0.8773      | 0.6622      | 0.8320 |
|               | ANN      | 0.7647   | 0.7941   | 0.9078      | 0.6215      | 0.8288 |
| Schizophrenia | RF       | 0.8759   | 0.8770   | 0.8976      | 0.8514      | 0.9292 |
|               | DT       | 0.8585   | 0.8629   | 0.8976      | 0.8152      | 0.8562 |
|               | NB       | 0.6822   | 0.7537   | 0.9765      | 0.3847      | 0.7429 |
|               | XGB      | 0.8683   | 0.8758   | 0.9325      | 0.7994      | 0.9234 |
|               | LightGBM | 0.8838   | 0.8911   | 0.9453      | 0.8179      | 0.9172 |
|               | ANN      | 0.6374   | 0.6998   | 0.8301      | 0.4531      | 0.6281 |
| Disease       | RF       | 0.7938   | 0.8216   | 0.9493      | 0.6384      | 0.8539 |
|               | DT       | 0.7921   | 0.8206   | 0.9512      | 0.6330      | 0.8527 |
|               | NB       | 0.5095   | 0.6692   | 0.9922      | 0.0268      | 0.5099 |
|               | XGB      | 0.7835   | 0.8118   | 0.9340      | 0.6329      | 0.8491 |
|               | LightGBM | 0.7921   | 0.8200   | 0.9475      | 0.6366      | 0.8563 |
|               | ANN      | 0.7861   | 0.8221   | 0.9886      | 0.5835      | 0.8520 |

**Table S14:** Variables Selected using Logistic Regression before Under Sampling.

| Depression               | Anxiety                  | Schizophrenia | Disease                  |
|--------------------------|--------------------------|---------------|--------------------------|
| Gender                   | Gender                   | Gender        | Gender                   |
| age                      | age                      | age           | age                      |
| InsulinDependentDiabetes | InsulinDependentDiabetes | Hypertension  | InsulinDependentDiabetes |

|                          |                          |                       |                          |
|--------------------------|--------------------------|-----------------------|--------------------------|
| Hypertension             | Hypertension             | Obesity               | Hypertension             |
| Osteoarthritis           | Osteoarthritis           | CoronaryArteryDisease | Osteoarthritis           |
| CancerMalignant          | CancerMalignant          | BMI                   | CancerMalignant          |
| Obesity                  | Obesity                  | Z_Pak                 | Obesity                  |
| CongenitalDiseaseOfHeart | CongenitalDiseaseOfHeart |                       | CongenitalDiseaseOfHeart |
| CerebrovascularDisease   | HeartFailure             |                       | HeartFailure             |
| CoronaryArteryDisease    | Atherosclerosis          |                       | Atherosclerosis          |
| NutritionDeficiency      | CoronaryArteryDisease    |                       | CoronaryArteryDisease    |
| ElevatedCRP              | NutritionDeficiency      |                       | NutritionDeficiency      |
| LongTermUseOfAntibiotics | ElevatedCRP              |                       | ElevatedCRP              |
| Z_Pak                    | LongTermUseOfAntibiotics |                       | LongTermUseOfAntibiotics |
|                          | Clarithromycin           |                       | Clarithromycin           |
|                          | Z_Pak                    |                       | Z_Pak                    |
|                          | VitB6                    |                       | Folate                   |
|                          | CoQ                      |                       | VitB6                    |
|                          |                          |                       | CoQ                      |

## References

1. Pourhoseingholi, M. A.; Baghestani, A. R.; Vahedi, M. How to Control Confounding Effects by Statistical Analysis. *Gastroenterol. Hepatol. from Bed to Bench* **2012**, *5*, 79–83. <https://doi.org/10.22037/ghfbb.v5i2.246>.

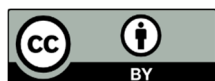

© 2020 by the authors. Submitted for possible open access publication under the terms and conditions of the Creative Commons Attribution (CC BY) license (<http://creativecommons.org/licenses/by/4.0/>).
